# Supplementary material for: Proteolytic Resistance Determines Albumin Nanoparticle Drug Delivery Properties and Increases Cathepsin B, D, and G Expression
Source: MDPI journal article supplement (doi:10.3390/ijms241210245), 2023-06-16
Supplement: s1 [file s1]

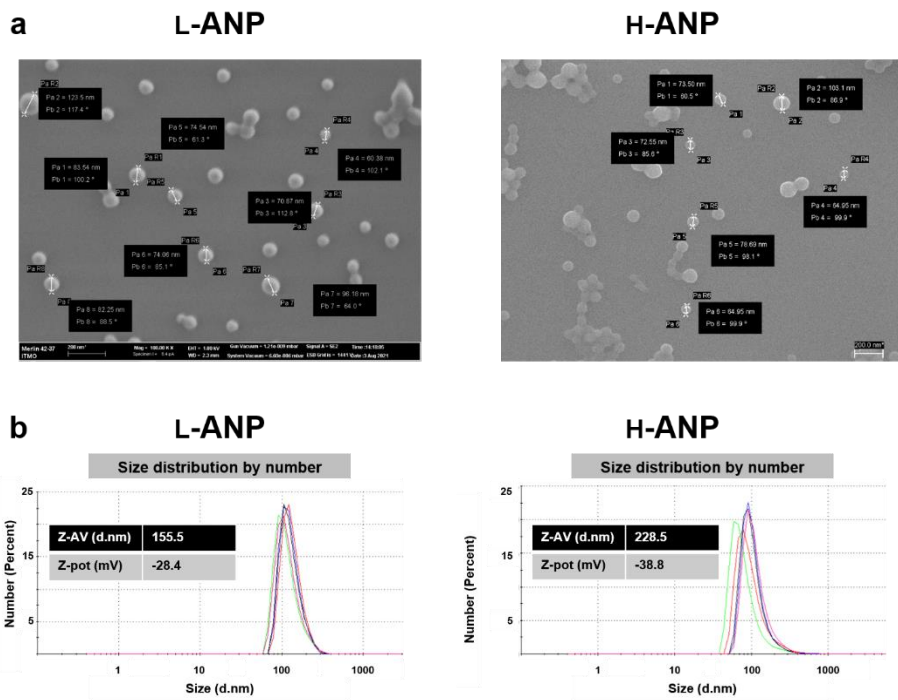

**Figure S1 Physical and chemical properties of the particles:** (a) Particle SEM analysis, scale bars correspond to 200 nm, particle size analysis is shown. (b) DLS analysis and Z-pot measurement in the table

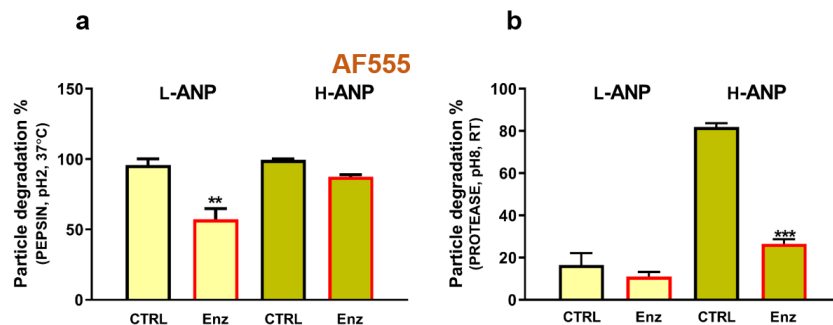

**Figure S2 Nanoparticle resistance vs proteolytic activity:** (a) Nanoparticle degradation after incubation with Pepsin. Albumin was previously labelled with AF555 (b) Nanoparticle degradation after incubation with commercial protease.

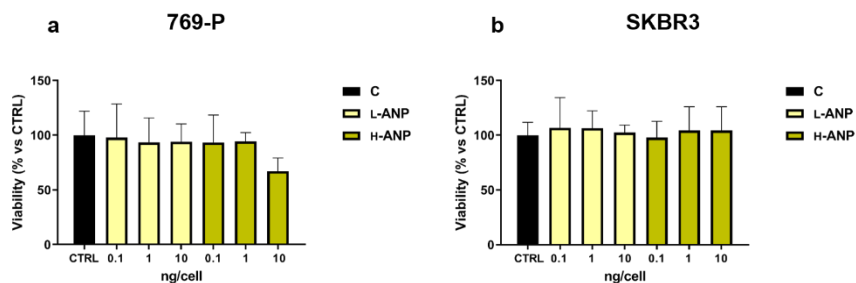

**Figure S3 ANP impact on cell viability:** (a) Cell viability of 769-P and (b) SKBR3 after incubation for 72 hours with increasing concentrations of L-ANP and H-ANP.
